# Supplementary material for: A new honeycomb metal–carboxylate-tetrazolate framework with multiple functions for CO2 conversion and selective capture of C2H2, CO2 and benzene
Source: Royal Society of Chemistry journal article supplement (doi:10.1039/d0qi00181c), 2020-01-01
Supplement: d0qi00181c1.pdf [file d0qi00181c1.pdf]

## *Supporting Information*

### **New honeycomb metal-carboxylate-tetrazolate framework with multiple functions in CO<sub>2</sub> conversion and selective capture for C<sub>2</sub>H<sub>2</sub>, CO<sub>2</sub> and benzene**

Gang-Ding Wang,<sup>a</sup> Yong-Zhi Li,<sup>a</sup> Wen-Juan Shi,<sup>a</sup> Lei Hou,<sup>\*a</sup> Zhonghua Zhu,<sup>b</sup> and Yao-Yu Wang<sup>a</sup>

<sup>a</sup>Key Laboratory of Synthetic and Natural Functional Molecule Chemistry of the Ministry of Education, National Demonstration Center for Experimental Chemistry Education (Northwest University), College of Chemistry & Materials Science, Northwest University, Xi'an, 710069, P. R. China. E-mail: lhou2009@nwu.edu.cn;

<sup>b</sup>School of Chemical Engineering, The University of Queensland, Brisbane 4072, Australia

\*To whom correspondence should be addressed. E-mail: lhou2009@nwu.edu.cn (Lei Hou).

#### **Contents**

|                                                |      |
|------------------------------------------------|------|
| 1. IR spectrum, TGA and pore size distribution | S2   |
| 2. Calculation of sorption heat                | S2-3 |
| 3. Selectivity prediction                      | S4   |
| 4. Mechanism for the catalytic reaction        | S5   |
| 5. Fitted adsorption isotherms of Bz and Cy    | S5   |
| 6. GCMC simulation methodology                 | S5   |
| 7. Table of crystallographic data              | S6-7 |
| 8. Comparison of adsorption data of Bz and Cy  | S7-8 |
| 9. <sup>1</sup> H NMR spectra characterization | S8-9 |

## 1. IR spectrum, TGA and Pore size distribution

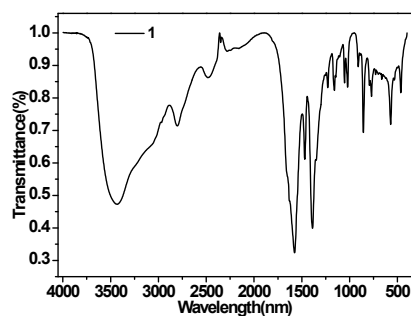

**Fig. S1** FTIR spectra of the as-synthesized **1**.

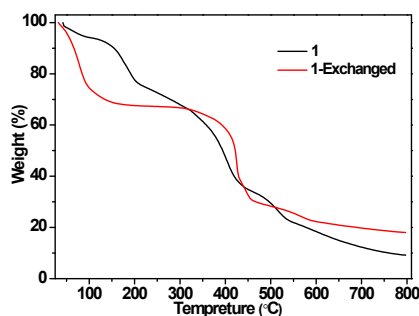

**Fig. S2** TGA curves of as-synthesized and exchanged samples of **1**.

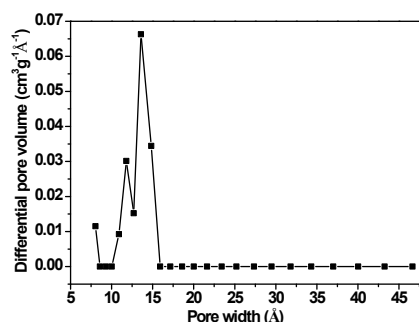

**Fig. S3** Porous distribution curve calculated from N<sub>2</sub> adsorption isotherm using the Horvath-Kawazoe model.

## 2. Calculation of sorption heat

$$\ln P = \ln N + 1/T \sum_{i=0}^m a_i N^i + \sum_{i=0}^n b_i N^i \quad Q_{st} = -R \sum_{i=0}^m a_i N^i$$

The virial 2 expression was used to fit the combined isotherm data for **1a** at 273.15, 298 and 308 K, where  $P$  is the pressure,  $N$  is the adsorbed amount,  $T$  is the temperature,  $a_i$  and  $b_i$  are virial coefficients, and  $m$  and  $n$  are the number of coefficients used to describe the isotherms.  $Q_{st}$  is the coverage-dependent enthalpy of adsorption and  $R$  is the universal gas constant.

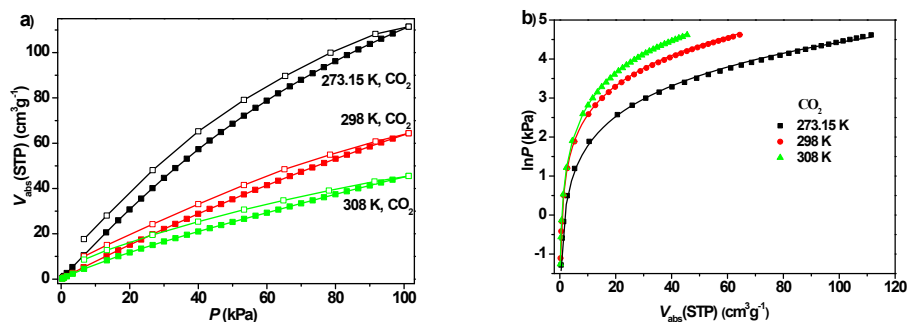

**Fig. S4** a) adsorption isotherms of **1a** for CO<sub>2</sub> at 273.15, 298 and 308 K; b) fitted CO<sub>2</sub> adsorption isotherms, fitting results:  $a_0 = -2611.34546$ ,  $a_1 = 1.53137$ ,  $a_2 = -0.00439$ ,  $b_0 = 8.98102$ ,  $\text{Chi}^2 = 0.00414$ ,  $R^2 = 0.99835$ .

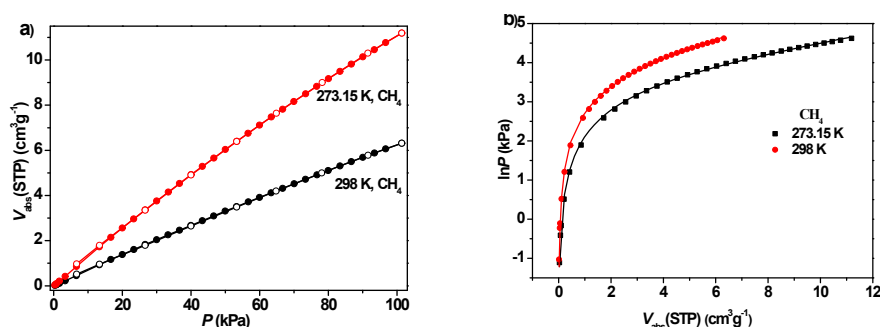

**Fig. S5** a) adsorption isotherms of **1a** for CH<sub>4</sub> at 273.15 and 298 K (Due to the adsorption amount of CH<sub>4</sub> at 308 K is too low, the adsorption isotherms at 273.15 and 298 K were used for adsorption heat calculation); b) fitted CH<sub>4</sub> adsorption isotherms, fitting results:  $a_0 = -2092.71309$ ,  $a_1 = -6.73453$ ,  $a_2 = 0.84735$ ,  $b_0 = 9.7922$ ,  $\text{Chi}^2 = 0.00311$ ,  $R^2 = 0.99874$ .

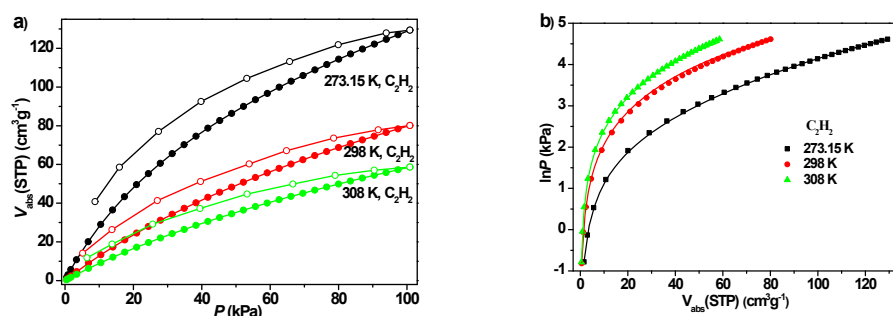

**Fig. S6** a) adsorption isotherms of **1a** for C<sub>2</sub>H<sub>2</sub> at 273.15, 298 and 308 K; b) fitted C<sub>2</sub>H<sub>2</sub> adsorption isotherms, fitting results:  $a_0 = -3002.82058$ ,  $a_1 = -15.34841$ ,  $a_2 = 0.23517$ ,  $a_3 = -0.00007$ ,  $b_0 = 9.74003$ ,  $b_1 = 0.06155$ ,  $b_2 = -0.00081$ ,  $\text{Chi}^2 = 0.00121$ ,  $R^2 = 0.99941$ .

### 3. Selectivity prediction

The experimental isotherm data for pure gas A, and gas B were fitted at 298 K using a dual Langmuir-Freundlich (L-F) model (Fig. S7):

$$q = \frac{a_1 * b_1 * P^{c_1}}{1 + b_1 * P^{c_1}} + \frac{a_2 * b_2 * P^{c_2}}{1 + b_2 * P^{c_2}}$$

Where  $q$  and  $p$  are adsorbed amounts and the pressure of component  $i$ , respectively.

The adsorption selectivities for binary mixtures of gas A and gas B, defined by

$$S_{i/j} = \frac{x_i * y_j}{x_j / y_i}$$

were respectively calculated using the Ideal Adsorption Solution Theory (IAST) of Myers and Prausnitz. Where  $x_i$  is the mole fraction of component  $i$  in the adsorbed phase and  $y_i$  is the mole fraction of component  $i$  in the bulk.

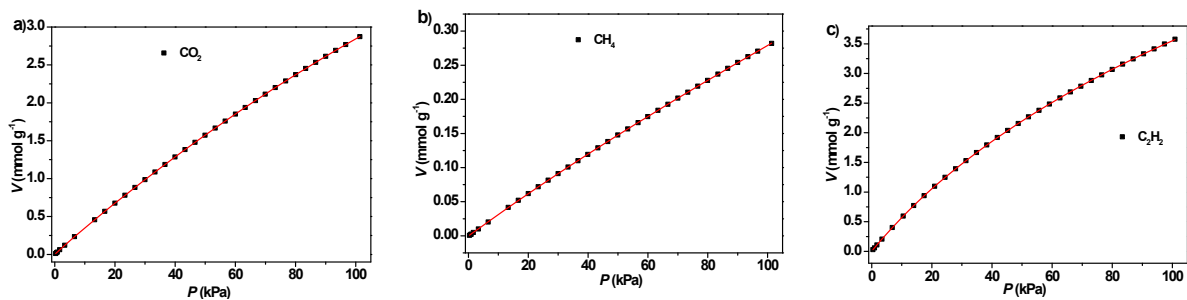

**Fig. S7** a) Fitted CO<sub>2</sub> adsorption isotherm:  $a_1 = 10.87605$ ,  $b_1 = 0.00197$ ,  $c_1 = 1.11169$ ,  $a_2 = 0.16549$ ,  $b_2 = 0.09675$ ,  $c_2 = 0.98184$ ,  $\text{Chi}^2 = 4.0333\text{E-}7$ ,  $R^2 = 1$ ; b) fitted CH<sub>4</sub> adsorption isotherm:  $a_1 = 2.8941$ ,  $b_1 = 0.00099$ ,  $c_1 = 1.01107$ ,  $a_2 = 0.00704$ ,  $b_2 = 0.01641$ ,  $c_2 = 1.4379$ ,  $\text{Chi}^2 = 5.8543\text{E-}8$ ,  $R^2 = 0.99999$ ; c) fitted C<sub>2</sub>H<sub>2</sub> adsorption isotherm:  $a_1 = 10.83758$ ,  $b_1 = 0.00606$ ,  $c_1 = 0.94884$ ,  $a_2 = 0.04347$ ,  $b_2 = 0.00091$ ,  $c_2 = 2.78385$ ,  $\text{Chi}^2 = 4.9104\text{E-}6$ ,  $R^2 = 1$ .

#### 4. Mechanism for the catalytic reaction

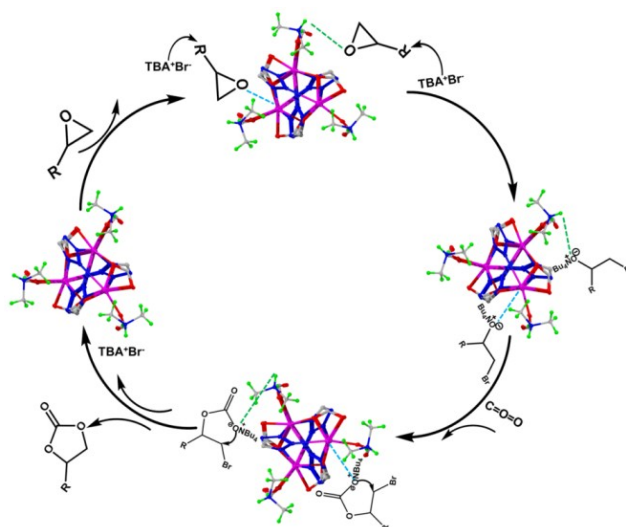

Fig. S8 Mechanism for the catalytic conversion of CO<sub>2</sub> with epoxides.

#### 5. Fitted adsorption isotherms of Bz and Cy

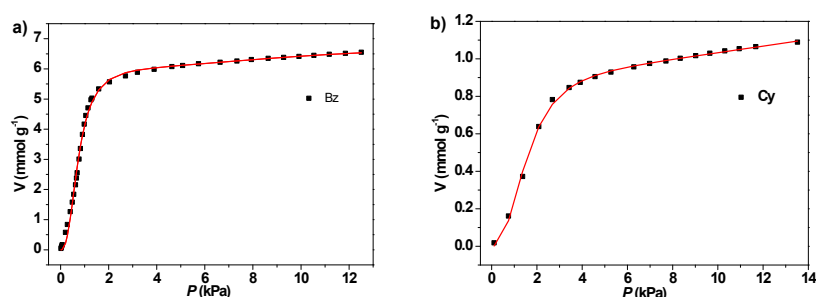

Fig. S9 a) Bz adsorption isotherm of **1a** fitted by dual L-F model: 298 K,  $a_1 = 6.08651$ ,  $b_1 = 2.08767$ ,  $c_1 = 2.54133$ ,  $a_2 = 0.65089$ ,  $b_2 = 0.0009$ ,  $c_2 = 3.09494$ ,  $\chi^2 = 0.02019$ ,  $R^2 = 0.99673$ ; (b) Cy adsorption isotherm of **1a** fitted by L-F model: 298 K,  $a_1 = 0.97135$ ,  $b_1 = 0.33051$ ,  $c_1 = 2.38574$ ,  $a_2 = 0.38835$ ,  $b_2 = 0.00067$ ,  $c_2 = 2.53741$ ,  $\chi^2 = 0.00019$ ,  $R^2 = 0.99857$ .

#### 6. GCMC simulation methodology

Grand canonical Monte Carlo (GCMC) simulations were performed for the gas adsorption in the framework by the Sorption module of Material Studio (Accelrys. Materials Studio Getting Started, release 5.0). The framework was considered to be rigid, and the optimized gas and epoxide molecules were used. The partial charges for atoms of the framework were derived

from QEq method and QEq\_neutral 1.0 parameter. One unit cell was used during the simulations. The interaction energies between the gas molecules and framework were computed through the Coulomb and Lennard-Jones 6-12 (LJ) potentials. All parameters for the atoms were modeled with the universal force field (UFF) embedded in the MS modeling package. A cutoff distance of 12.5 Å was used for LJ interactions, and the Coulombic interactions were calculated by using Ewald summation. For each run, the  $3 \times 10^6$  maximum loading steps,  $3 \times 10^6$  production steps were employed.

## 7. Table of crystallographic data

**Table S1.** Crystallographic data for **1**.

|                                            |                     |
|--------------------------------------------|---------------------|
| Chemical formula                           | $C_8H_{10}CdN_5O_4$ |
| Formula weight                             | 352.62              |
| $T$ (K)                                    | 296(2)              |
| Crystal system                             | Trigonal            |
| Space group                                | $R\bar{3}$          |
| $a$ (Å)                                    | 32.068(3)           |
| $b$ (Å)                                    | 32.068(3)           |
| $c$ (Å)                                    | 8.244(1)            |
| $\alpha, \beta, \gamma$ (°)                | 90, 90, 120         |
| $V$ (Å <sup>3</sup> )                      | 7342.0(19)          |
| $Z$                                        | 18                  |
| $D_{\text{calcd.}}$ (g·cm <sup>-3</sup> )  | 1.436               |
| $\mu$ (mm <sup>-1</sup> )                  | 1.350               |
| Reflns collected, unique, $R_{\text{int}}$ | 2991, 2991, 0.0626  |
| Goof                                       | 1.182               |
| $R_1^a, wR_2^b$ ( $I > 2\sigma$ )          | 0.0883, 0.2380      |
| $R_1^a, wR_2^b$ (all data)                 | 0.0885, 0.2382      |

$$^aR_1 = \Sigma||F_o| - |F_c||/\Sigma|F_o|; \quad ^b wR_2 = [\Sigma w(F_o^2 - F_c^2)^2/\Sigma w(F_o^2)^2]^{1/2}.$$

**Table S2.** Selected bond lengths [Å] and angles [°] for **1**.

|              |           |                   |          |                     |          |
|--------------|-----------|-------------------|----------|---------------------|----------|
| Cd(1)-O(3)   | 2.266(13) | N(1)-Cd(1)-N(3)#1 | 152.3(4) | O(1)-Cd(1)-O(1)#2   | 142.0(3) |
| Cd(1)-N(1)   | 2.272(10) | O(3)-Cd(1)-O(1)   | 85.2(5)  | O(3)-Cd(1)-O(2)#2   | 80.3(5)  |
| Cd(1)-N(3)#1 | 2.299(10) | N(1)-Cd(1)-O(1)   | 83.7(4)  | N(1)-Cd(1)-O(2)#2   | 100.6(5) |
| Cd(1)-O(1)   | 2.353(10) | N(3)#1-Cd(1)-O(1) | 79.3(4)  | N(3)#1-Cd(1)-O(2)#2 | 101.4(6) |
| Cd(1)-O(1)#2 | 2.428(10) | O(3)-Cd(1)-O(1)#2 | 132.1(5) | O(1)-Cd(1)-O(2)#2   | 165.5(4) |

|                   |          |                         |         |                     |         |
|-------------------|----------|-------------------------|---------|---------------------|---------|
| O(3)-Cd(1)-N(1)   | 110.5(6) | N(1)-Cd(1)-O(1)#2       | 88.0(3) | O(1)#2-Cd(1)-O(2)#2 | 52.4(4) |
| O(3)-Cd(1)-N(3)#1 | 89.7(6)  | N(3)#1-Cd(1)-<br>O(1)#2 | 92.1(4) |                     |         |

Symmetry codes: #1 = 1/3-x+y, 2/3-x, z+2/3, #2 = 1/3-x+y, 2/3-x, z-1/3, #3 = 2/3-y, x-y+1/3, z+1/3, #4 = 2/3-y, x-y+1/3, z-2/3, #5 = 1/3-x, 2/3-y, 2/3-z.

## 8. Comparison of adsorption data of Bz and Cy

**Table S3.** Benzene and cyclohexane adsorption amounts and selectivity for **1** compared with various reported porous materials at 298 K.

| Material                                                    | Bz (cm <sup>3</sup> g <sup>-1</sup> ) | Cy (cm <sup>3</sup> g <sup>-1</sup> ) | Selectivity     | Reference |
|-------------------------------------------------------------|---------------------------------------|---------------------------------------|-----------------|-----------|
| COF-1                                                       | 220.0                                 | 87.0                                  |                 | 1         |
| Mn-MOF-74                                                   | 210.1                                 | 5.6                                   | --              | 2         |
| Co-MOF-74                                                   | 124.8                                 | 5.2                                   | 10 <sup>5</sup> |           |
| Zn-MOF-74                                                   | 151.1                                 | 3.8                                   | --              |           |
| <b>1</b>                                                    | 146.7                                 | 24.4                                  | 7086            | This work |
| MFOF-1                                                      | 90.5                                  | 34.3                                  | --              | 3         |
| Ce-LOF                                                      | 89.0                                  | 41.4                                  | 13.6            | 4         |
| Ni <sub>3</sub> (OH)(Ina) <sub>3</sub> (BDC) <sub>1.5</sub> | 84.1                                  | 3.8                                   | --              | 5         |
| MAF-2                                                       | 59.2                                  | --                                    | --              | 6         |
| {[Cd(ATAIA)]·4H <sub>2</sub> O} <sub>n</sub>                | 52                                    | 8                                     |                 | 7         |
| PCN-TPC                                                     | 50.5                                  | 19.7                                  | --              | 8         |
| PAF-2                                                       | 39.6                                  | 2.3                                   | --              | 9         |
| DAT-MOF-1                                                   | 33.6                                  | 4.5                                   | 200             | 10        |
| 2-bpe                                                       | 31.0                                  | 2.7                                   | --              | 11        |

## References

- [1] P. Dasa and S. K. Mandal, A dual-functionalized, luminescent and highly crystalline covalent organic framework: molecular decoding strategies for VOCs and ultrafast TNP sensing, *J. Mater. Chem. A*, 2018, **6**, 16246-16256.
- [2] S. Mukherjee, B. Manna A. V. Desai, Y. Yin, R. Krishna, R. Babarao and S. K. Ghosh, Harnessing Lewis acidic open metal sites of metal-organic frameworks: the foremost route to achieve highly selective benzene sorption over cyclohexane, *Chem. Commun.*, 2016, **52**, 8215-8218.
- [3] L. Zhang, W. Yang, X. -Y. Wu, C. Z. Lu and W. Z. Chen, A Hydrophobic Metal–Organic Framework Based on Cubane-Type [Co<sub>4</sub>(μ<sub>3</sub>-F)<sub>3</sub>(μ<sub>3</sub>-SO<sub>4</sub>)]<sup>3+</sup> Clusters for Gas Storage and Adsorption Selectivity of Benzene over Cyclohexane, *Chem. Eur. J*, 2016, **22**, 11283-11290.
- [4] Z. Lin, R. Zou, W. Xia, L. Chen, X. Wang, F. Liao, Y. Wang, J. Lin and A. K. Burrell, Ultrasensitive sorption behavior of isostructural lanthanide-organic frameworks induced by lanthanide contraction, *J. Mater. Chem.*, 2012, **22**, 21076-21084.
- [5] G. Ren, S. Liu, F. Ma, F. Wei, Q. Tang, Y. Yang, D. Liang, S. Li and Y. Chen, A 9-

- connected Metal-Organic Framework with Gas Adsorption Properties. *J. Mater. Chem.*, 2011, 21, 15909-15913.
- [6] J.-P. Zhang and X. M. Chen, Exceptional Framework Flexibility and Sorption Behavior of a Multifunctional Porous Cuprous Triazolate Framework, *J. Am. Chem. Soc.*, 2008, **130**, 6010-6017.
- [7] P. Das and S. K. Mandal, Strategic Design and Functionalization of an Amine-decorated Luminescent Metal Organic Framework for Selective Gas/Vapor Sorption and Nanomolar Sensing of 2,4,6-Trinitrophenol in Water, *ACS Appl. Mater. Interfaces.*, 2018, **10**, 25360-25371.
- [8] G. Deng and Z. Wang, Triptycene-Based Microporous Cyanate Resins for Adsorption/Separations of Benzene/Cyclohexane and Carbon Dioxide Gas, *ACS Appl. Mater. Interfaces.*, 2017, **9**, 41618-41627.
- [9] H. Ren, T. Ben, E. Wang, X. Jing, M. Xue, B. Liu, Y. Cui, S. Qiu and G. Zhu, Targeted synthesis of a 3D porous aromatic framework for selective sorption of benzene, *Chem. Commun.*, 2010, **46**, 291-293.
- [10] B. Manna, S. Mukherjee, A. V. Desai, S. Sharma, R. Krishna and S. K. Ghosh, A  $\pi$ -electron deficient diaminotriazine functionalized MOF for selective sorption of benzene over cyclohexane, *Chem. Commun.*, 2015, **51**, 15386-15389.
- [11] C. X. Ren, L. X. Cai, C. Chen, B. Tan, Y. J. Zhang and J. Zhang,  $\pi$ -Conjugation-directed highly selective adsorption of benzene over cyclohexane, *J. Mater. Chem. A*, 2014, **2**, 9015-9019.

## 9. <sup>1</sup>H NMR spectra characterization

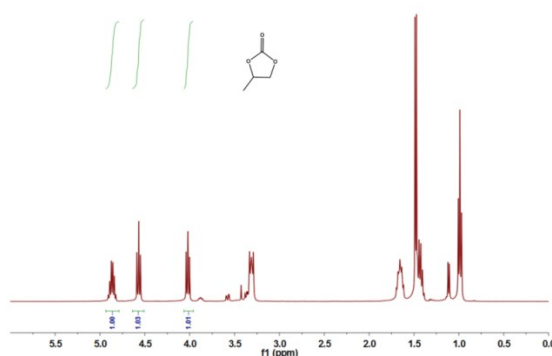

<sup>1</sup>H NMR spectrum of propylene carbonate in CDCl<sub>3</sub>.

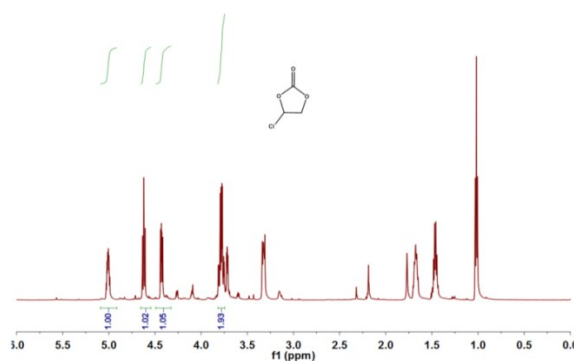



$^1\text{H}$  NMR spectrum of 4-chloromethyl-1, 3-dioxolan-2-one in  $\text{CDCl}_3$ .

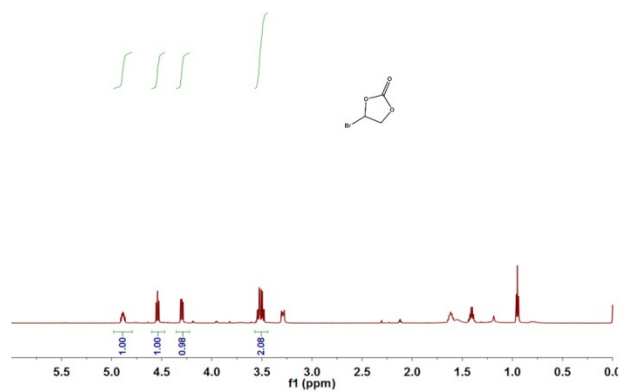

$^1\text{H}$  NMR spectrum of 4-bromomethyl-1, 3-dioxolan-2-one in  $\text{CDCl}_3$ .

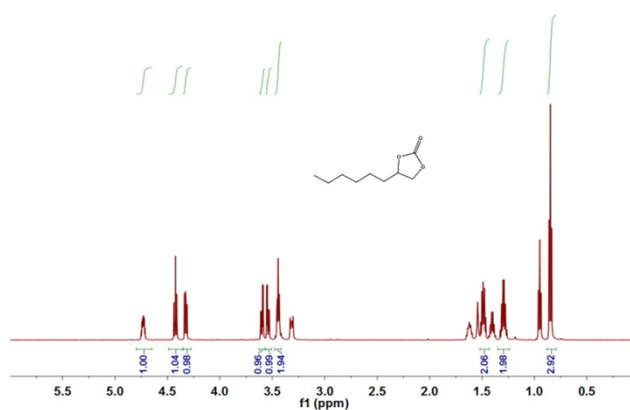

$^1\text{H}$  NMR spectrum of 3-butoxy-1, 2-propylene carbonate in  $\text{CDCl}_3$ .

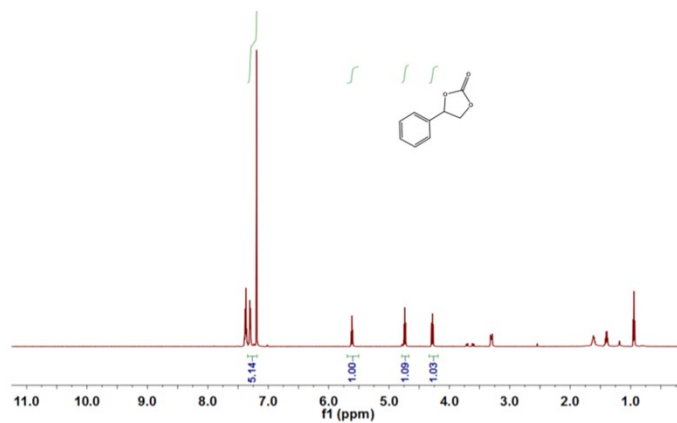

$^1\text{H}$  NMR spectrum of styrene carbonate in  $\text{CDCl}_3$ .
